# Supplementary material for: Diverse histone modifications on histone 3 lysine 9 and their relation to DNA methylation in specifying gene silencing
Source: PubMed Central journal article supplement (PMC1888705; doi:10.1186/1471-2164-8-131), 2007-05-24
Supplement: 1471-2164-8-131-S2.pdf [file 1471-2164-8-131-S2.pdf]

**Table S2. The targets selected for COBRA and CHIP-PCR.**

| RLGS ID | GB Accession | Name     | CpG island | mouse leukemia(8) | RLGS <sup>b</sup> | A/in <sup>c</sup> | M/in <sup>d</sup> | Function                                                                                                                                                |
|---------|--------------|----------|------------|-------------------|-------------------|-------------------|-------------------|---------------------------------------------------------------------------------------------------------------------------------------------------------|
| 2F72    | BC011343     | mRNA     | Yes        | 1 <sup>a</sup>    | -                 | ↑                 | ↓                 | Unknown                                                                                                                                                 |
| 3D04    | AB041610     | Cog8     | Yes        | 0                 | +                 | ↑                 | ↓                 | Component of oligomeric golgi complex 8.                                                                                                                |
| 5G61    | AF487346     | Dscam1   | Yes        | 1                 | -                 | ↑                 | ↓                 | Down syndrome cell adhesion molecule-like 1. cell adhesion molecule that can mediate cation- independent homophilic binding activity.                   |
| 1F08    | AK075900     | Ran      | Yes        | 0                 | +                 | ↑                 | ↓                 | Member RAS oncogene family. GTP-binding protein involved in nucleocytoplasmic transport.                                                                |
| 6G41    | AY196089     | Dot1l    | Yes        | 0                 | +                 | ↑                 | ↓                 | Histone H3 methyltransferase DOT1.                                                                                                                      |
| 3D07    | AF121344     | Tspan5   | Yes        | 0                 | +                 | ↑                 | ↓                 | Tetraspanin 5.                                                                                                                                          |
| 4C18    | AF459435     | Slc6a8   | Yes        | 0                 | +                 | ↓                 | ↑                 | Solute carrier family 6 (neurotransmitter transporter, creatine), member 8. Required for the uptake of creatine.                                        |
| 2G50    | AY371925     | Mamdc1   | Yes        | 6                 | -                 | ↓                 | ↑                 | MAM domain containing 1. May involved in cell-cell interactions                                                                                         |
| 1F21    | D70849       | Zic3     | Yes        | 6                 | -                 | ↓                 | ↑                 | Zinc finger protein of the cerebellum 3. Probably functions as a transcription factor in the earliest stages of the left-right (lr) body axis formation |
| 5G21    | D14340       | Tjp1     | Yes        | 6                 | -                 | ↓                 | ↑                 | Tight junction protein 1. Homologous to the product of the 'discs large-1' tumor suppressor gene of Drosophila. may be involved in tight junction.      |
| 4E24    | AB041591     | Slc16a11 | Yes        | 7                 | -                 | ↓                 | ↑                 | Solute carrier family 16 (monocarboxylic acid transporters), member 11.                                                                                 |
| 4G54    | BC065168     | Kbtbd9   | Yes        | 5                 | -                 | ↓                 | ↑                 | Kelch repeat and BTB (POZ) domain containing 9.                                                                                                         |

<sup>a</sup> The numbers indicate methylated samples identified by RLGS from a total of 8 test samples.

<sup>b</sup> “-”, Spot lost in L1210 identified by RLGS; “+”, spot detected in L1210 by RLGS.

<sup>c, d</sup> A/in, M/in indicate the level of acetyl-H3K9 and dimethyl-H3K9.
