# Supplementary material for: Diverse histone modifications on histone 3 lysine 9 and their relation to DNA methylation in specifying gene silencing
Source: PubMed Central journal article supplement (PMC1888705; doi:10.1186/1471-2164-8-131), 2007-05-24
Supplement: 1471-2164-8-131-S3.pdf [file 1471-2164-8-131-S3.pdf]

**Table S3. The primers used in COBRA, ChIP-PCR, promoter landscaping analysis and RT-PCR.**

| Name                        | 5' Primer                  | 3' Primer                   | Annealing temperature, °C |
|-----------------------------|----------------------------|-----------------------------|---------------------------|
| <b>COBRA</b>                |                            |                             |                           |
| p19ARF                      | ggtttttggtattgtgaggattta   | aaccttctacctaataccaaaatt    | 56                        |
| BC011343                    | tggggagttgttagttagtagt     | ctcccttaaaaaacaacaccttc     | 55                        |
| Cog8                        | gtatttgtagttttggaag        | taaaaaataaaaaataaaacctcctaa | 55                        |
| Ran                         | taattgtgttagggaggtag       | ccaaatctataccacaaacac       | 55                        |
| Dot1l                       | ggttttgtagttttataaagaggg   | acttaaacctcaactccaacttctc   | 55                        |
| Tspan5                      | tgttttatgaatttagaggatgtt   | aaaccttaactaccccctacc       | 55                        |
| ID4                         | atttgagatattttttaaaattt    | aaccacccaaactataacc         | 50                        |
| Dscaml1                     | tttaggtgggggtggagtagtat    | ccacataccataaaaaaacctatt    | 55                        |
| Slc6a8                      | atagttattgggggtgggt        | taaacctaaaaaatctcatatatac   | 55                        |
| Mamdc1                      | ttattttgtagggagggaggat     | cctctacccaactaaacatctctac   | 55                        |
| Zic3                        | taggttagttggttttattgggt    | aaatttatcaatcctatccc        | 55                        |
| Tjp1                        | ggttgggtatgttagtggtt       | aaaaatcaaaataaaacaaaaatcc   | 55                        |
| Slc16a11                    | ttattttgtagttgtagttggtt    | acctaaaaataaaaaatcctaaatac  | 55                        |
| Kbtbd9                      | ggatttttagagtttaattgatt    | aaacaaaaaaactaacttccctctc   | 55                        |
| <b>ChIP-PCR</b>             |                            |                             |                           |
| p19ARF                      | ttatagatggactcggagcaagg    | cccctagcagtagctgcg          | 58                        |
| BC011343                    | gaggacggtccaggcttta        | gaccggatgtacagggtaa         | 58                        |
| Cog8                        | cccacctcacctacatag         | agcatcggagagaacctca         | 58                        |
| Ran                         | ttgtgtcctccctctc           | gactggagctggaaagatgg        | 58                        |
| Dot1l                       | tggtctctctcgcttctc         | accgacgcacgcacttac          | 58                        |
| Tspan5                      | aagccacctcttttcagg         | cgagagagacgaggggaacac       | 58                        |
| ID4                         | ggcgatccaccttagtcgaag      | ttgtgagcgacaatcggc          | 58                        |
| Dscaml1                     | ttccccttacatggcagac        | cagtctcgatcctgctctc         | 58                        |
| Slc6a8                      | aaagagcgtgaaaacggta        | atctggcgtgtccaagtctc        | 58                        |
| Mamdc1                      | agagcagatccgcacacc         | tctaaactcccgccagtctc        | 58                        |
| Zic3                        | cgctcttgagtagaggag         | ggaggagaaggaggagaaa         | 58                        |
| Tjp1                        | cacaggagttggggttctc        | ttactgttaggcggttcc          | 58                        |
| Slc16a11                    | ctatccctaggcctggttcc       | gtgggaaacacctgtgaat         | 58                        |
| Kbtbd9                      | aggaggggtgatggatagg        | aggaacgagagggagggtggac      | 58                        |
| <b>Promoter landscaping</b> |                            |                             |                           |
| Ran-1                       | tagaggtgactcggctcgtaagagta | tggaactggaattacagaatagttgtg | 58                        |

|               |                             |                              |    |
|---------------|-----------------------------|------------------------------|----|
| Ran-2         | taacagatgcttaaacaatgcactagt | ccatattctgtagtccattgaaaacac  | 58 |
| Ran-3         | ctacctcaatcaagtgaccacagat   | acgcctgctcttcatatgtcttat     | 58 |
| Ran-4         | tggaaggcataatggtgagagtg     | gggcagtaccctagactgaacaaa     | 58 |
| Ran-5         | atgcccgctgagtgattctc        | tgtctggcaaccagcct            | 58 |
| Ran-6         | ttgctggtcaattgctgctc        | tccaggcggtcagcatcc           | 58 |
| Ran-7         | gtccgctgctctccg             | cctcgacgtacctccaga           | 58 |
| Ran-8         | ccgctcgtctccatacca          | cctggatgtagtagccatcgc        | 58 |
| Ran-9         | tggtgctgtgatcatatgctg       | tgacccgggagcttcc             | 58 |
| Ran-10        | taaagacgaatgaataccttgatctt  | accccggtataaacacccc          | 58 |
| Ran-11        | ctaactggcatagagatctggtacga  | aatagatttgccttcacttctgt      | 58 |
| Ran-12        | ttagaatgtctggaatggagattat   | agttgtagttacttttggcagaaatgtc | 58 |
| Zic3-1        | atgtaaaccacagtaagccaaagt    | tcagacaggaccactcgaacc        | 58 |
| Zic3-2        | ccacaacagaattcgaatggtc      | taggagtgtagttgtcagtgagg      | 58 |
| Zic3-3        | aggaatgctagtcccaactacc      | cagataccgggataagcgagg        | 58 |
| Zic3-4        | gagggcagaaccggaaaag         | ccatctctctgtagcaaacacaact    | 58 |
| Zic3-5        | acacgaaaagcacagtcactgtct    | gacacataccagaaacaagcatagatg  | 58 |
| Zic3-6        | ctgttctatcacgggacaagg       | gagcctactaacggtaattcggag     | 58 |
| Zic3-7        | gcgctgccaatcattgtgt         | aatcactcactcctcgacataaa      | 58 |
| Zic3-8        | cgcgctcttgagtagaggag        | ggaggagaagggaggagaaa         | 58 |
| Zic3-9        | cgagcagcttcacgctcc          | gttgtccacgtgccctgtg          | 58 |
| Zic3-10       | aagaagagctgcgaccgga         | ccaatagcagacgtggtgttc        | 58 |
| Zic3-11       | cgccgagaccttcagtacc         | ggaacttagaactcggcaaaaagc     | 58 |
| Zic3-12       | actaccaggcttagcaaaaaccg     | aaccaagctgggtaggacaatg       | 58 |
| <b>RT-PCR</b> |                             |                              |    |
| Zic3          | tgcgacaagtctcacacaca        | ctatagcgggtggagtggaa         | 58 |
| Tjp1          | gcagccaaagaaggcttaga        | ggaggtaaggaggaaaagg          | 58 |
| Cog8          | agttctgcactgccttctg         | gtccaaggttccgtgctta          | 58 |
| Ran           | tgtgtggcaacaaagtggat        | ctggcaagccagaggaaag          | 58 |
| GAPDH         | cgggtgtgaacggatttggc        | tttgatgttagtgggtctcgc        | 58 |
